# Supplementary material for: Restraining deactivation of hierarchical zeolite supported NiW catalysts in the HDS of thiophene
Source: Royal Society of Chemistry journal article supplement (doi:10.1039/c5ra12029b), 2015-01-01

Figure SI-1 : Catalytic performance for thiophene HDS of various hierarchical Mordenite supported NiW catalysts (Acronym have the same signification than for NiW/HB catalysts).

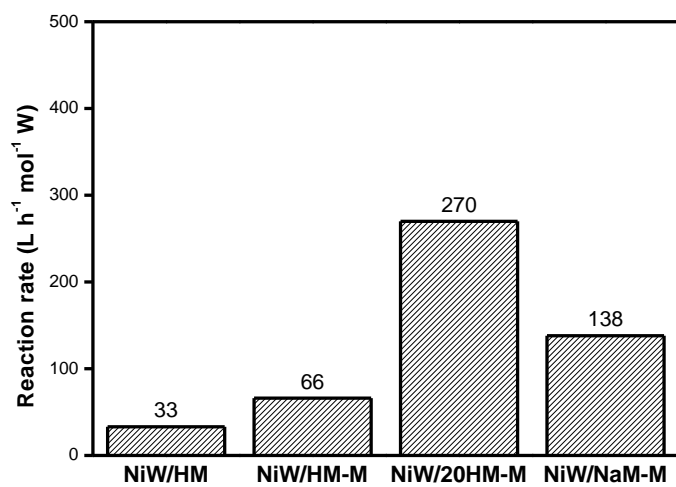

Supplement: c5ra12029b1.pdf [file c5ra12029b1.pdf]
